# Supplementary material
Source: PubMed Central journal article supplement (PMC8792108)
Supplement: NIHMS1708530-supplement-1.pdf [file NIHMS1708530-supplement-1.pdf]

## Supplement 1

**Table 1***Missing data analysis (comparing those not missing IPV data versus those missing IPV data)*

| Variable                          | <i>M</i> not missing | <i>M</i> missing | Comparison                      |
|-----------------------------------|----------------------|------------------|---------------------------------|
| Coercive relationship talk        |                      |                  |                                 |
| Shallow talk                      | 4.69                 | 4.83             | $F(1,719) = .58, p = .45$       |
| Coercive joining                  | 2.02                 | 2.09             | $F(1,719) = 1.41, p = .24$      |
| Deviancy training                 | .07                  | .08              | $F(1,711) = 1.25, p = .26$      |
| Family conflict                   |                      |                  |                                 |
| Child-report                      | 2.29                 | 2.27             | $F(1,643) = .05, p = .83$       |
| Mother-report                     | 2.21                 | 2.19             | $F(1,605) = .03, p = .86$       |
| Father-report                     | 2.14                 | 2.01             | $F(1,305) = .77, p = .38$       |
| Violent behavior                  |                      |                  |                                 |
| Carried a weapon (y/n)            | .09                  | .07              | $\chi^2(1) = 1.00, p = .32$     |
| Violent crime arrest (y/n)        | .16                  | .24              | $\chi^2(1) = 4.65, p < .05$     |
| Mother-report aggressive behavior | 53.22                | 53.56            | $F(1,611) = .57, p = .45$       |
| Father-report aggressive behavior | 52.21                | 53.11            | $F(1,289.62) = 2.62, p = .11$   |
| Substance use                     |                      |                  |                                 |
| Alcohol                           | 7.59                 | 7.75             | $F(1,853) = .21, p = .65$       |
| Marijuana                         | 2.37                 | 2.34             | $F(1,842) = .01, p = .94$       |
| High-risk sexual behavior         |                      |                  |                                 |
| Number of sexual partners         | .37                  | .59              | $F(1,687.26) = 2.90, p = .09$   |
| Number of partners w/o dating     | .45                  | .78              | $F(1,690.50) = 15.13, p < .001$ |
| Number of partners dating others  | .73                  | 1.10             | $F(1,677.65) = 4.40, p < .05$   |
| Number of partners not known well | .19                  | .31              | $F(1,684.30) = 2.86, p = .09$   |
| Number of partners IV drug users  | .34                  | .25              | $F(1,687) = .65, p = .42$       |

*Note.* For dichotomous outcomes, chi-square analysis was used for group comparison. For

continuous outcomes, ANOVA analysis was used with Welch correction as needed for violation of assumption of homogeneity of variance.

## Supplement 2

**IPV perpetration**

Target participants' self-reports about IPV perpetration and partners' reports about the target participants' IPV perpetration were used as indicators for the latent variable IPV perpetration. The mediation model fit was adequate, CFI = .92, TLI = .90, RMSEA = .033 [.029|.037],  $\chi^2(246) = 513.52, p < .001, \chi^2/df = 2.09$ . Factor loadings were generally above .30. Overall, results were similar to the dyadic IPV model. We found significant pathways from family conflict to high-risk sexual behavior ( $\beta = .12, p < .05$ ) but not to violence ( $\beta = .10, p = .10$ ) or substance use ( $\beta = .07, p = .24$ ). Coercive relationship talk was related to violence ( $\beta = .47, p < .001$ ) but not to substance use ( $\beta = .07, p = .23$ ) or high-risk sexual behavior ( $\beta = .02, p = .74$ ). Only violence predicted IPV perpetration ( $\beta = .34, p < .01$ ), while substance use ( $\beta = .02, p = .92$ ) and high-risk sexual behavior ( $\beta = -.04, p = .71$ ) did not. Indirect effects from coercive relationship talk to IPV via violent behavior were significant ( $\beta = .16, p < .05$ ). Gender differences in model results were not significant,  $\chi^2(30) = 19.52, ns$ .

**IPV victimization**

Second, a model with IPV *victimization* as an outcome was tested. Target participants' self-reports about their partners' engagement in IPV and partners' reports about their own engagement in IPV were used as indicators for IPV victimization. The mediation model fit was adequate, CFI = .92, TLI = .90, RMSEA = .033 [.029|.037],  $\chi^2(246) = 516.45, p < .001, \chi^2/df = 2.10$ . Factor loadings were generally above .30. Overall, results were similar to the dyadic IPV and the IPV perpetration model. We found significant pathways from family conflict to high-risk sexual behavior ( $\beta = .12, p < .05$ ) but not to violence ( $\beta = .11, p = .09$ ) or substance use ( $\beta = .07, p = .22$ ). Coercive relationship talk was related to violence ( $\beta = .47, p < .001$ ) but not to

substance use ( $\beta = .07, p = .22$ ) or high-risk sexual behavior ( $\beta = .02, p = .76$ ). Only violence predicted IPV victimization ( $\beta = .44, p < .01$ ), while substance use ( $\beta = .11, p = .51$ ) and high-risk sexual behavior ( $\beta = -.07, p = .56$ ) did not. Indirect effects from coercive relationship talk to IPV via violent behavior were significant ( $\beta = .20, p < .05$ ). Gender differences in model results were not significant,  $\chi^2(30) = 21.27, ns$ .
